# Supplementary material
Source: ML conference proceedings conference paper supplement (https://aclanthology.org/D16-1157)
Supplement: Attachment [file supp.pdf › supp.pdf]

# Supplementary Material for CHARAGRAM: Embedding Words and Sentences via Character $n$ -grams

**John Wieting   Mohit Bansal   Kevin Gimpel   Karen Livescu**  
Toyota Technological Institute at Chicago, Chicago, IL, 60637, USA  
{jwieting, mbansal, kgimpel, klivescu}@ttic.edu

## 1 Training

For word and sentence similarity, we follow the training procedure of Wieting et al. (2015) and Wieting et al. (2016), described below. For part-of-speech tagging, we follow the English Penn Treebank training procedure of Ling et al. (2015).

For the similarity tasks, the training data consists of a set  $X$  of phrase pairs  $\langle x_1, x_2 \rangle$  from the Paraphrase Database (PPDB; Ganitkevitch et al., 2013), where  $x_1$  and  $x_2$  are assumed to be paraphrases. We optimize a margin-based loss:

$$\min_{\theta} \frac{1}{|X|} \left( \sum_{\langle x_1, x_2 \rangle \in X} \max(0, \delta - \cos(g(x_1), g(x_2))) \right. \\ \left. + \cos(g(x_1), g(t_1))) + \max(0, \delta - \cos(g(x_1), g(x_2))) \right. \\ \left. + \cos(g(x_2), g(t_2))) \right) + \lambda \|\theta\|^2$$

where  $g$  is the embedding function in use,  $\delta$  is the margin, the full set of parameters is contained in  $\theta$  (e.g., for the CHARAGRAM model,  $\theta = \langle W, b \rangle$ ),  $\lambda$  is the  $L_2$  regularization coefficient, and  $t_1$  and  $t_2$  are carefully selected negative examples taken from a mini-batch during optimization (discussed below). Intuitively, we want the two phrases to be more similar to each other ( $\cos(g(x_1), g(x_2))$ ) than either is to their respective negative examples  $t_1$  and  $t_2$ , by a margin of at least  $\delta$ .

### 1.1 Selecting Negative Examples

To select  $t_1$  and  $t_2$  in Eq. 2, we tune the choice between two approaches. The first, MAX, sim-

ply chooses the most similar phrase in some set of phrases (other than those in the given phrase pair). For simplicity and to reduce the number of tunable parameters, we use the mini-batch for this set, but it could be a separate set. Formally, MAX corresponds to choosing  $t_1$  for a given  $\langle x_1, x_2 \rangle$  as follows:

$$t_1 = \operatorname{argmax}_{t: \langle t, \cdot \rangle \in X_b \setminus \{\langle x_1, x_2 \rangle\}} \cos(g(x_1), g(t))$$

where  $X_b \subseteq X$  is the current mini-batch. That is, we want to choose a negative example  $t_i$  that is similar to  $x_i$  according to the current model parameters. The downside of this approach is that we may occasionally choose a phrase  $t_i$  that is actually a true paraphrase of  $x_i$ .

The second strategy selects negative examples using MAX with probability 0.5 and selects them randomly from the mini-batch otherwise. We call this sampling strategy MIX. We tune over the choice of strategy in our experiments.

## 2 Tuning Word Similarity Models

For all architectures, we tuned over the mini-batch size (25 or 50) and the type of sampling used (MIX or MAX).  $\delta$  was set to 0.4 and the dimensionality  $d$  of each model was set to 300.

For the CHARAGRAM model, we tuned the activation function  $h$  (tanh or linear) and regularization coefficient  $\lambda$  (over  $\{10^{-4}, 10^{-5}, 10^{-6}\}$ ). The  $n$ -gram vocabulary  $V$  contained all 100,283 character  $n$ -grams ( $n \in \{2, 3, 4\}$ ) in the lexical section of PPDB XXL.

For charCNN and charLSTM, we randomly initialized 300 dimensional character embeddings for

| Dataset          | 50%  | 75%  | Max  | charCNN | charLSTM | PARAGRAM-PHRASE | CHARAGRAM-PHRASE |
|------------------|------|------|------|---------|----------|-----------------|------------------|
| MSRpar           | 51.5 | 57.6 | 73.4 | 50.6    | 23.6     | 42.9            | <b>59.7</b>      |
| MSRvid           | 75.5 | 80.3 | 88.0 | 72.2    | 47.2     | 76.1            | <b>79.6</b>      |
| SMT-eur          | 44.4 | 48.1 | 56.7 | 50.9    | 38.5     | 45.5            | <b>57.2</b>      |
| OnWN             | 60.8 | 65.9 | 72.7 | 61.8    | 53.0     | <b>70.7</b>     | 68.7             |
| SMT-news         | 40.1 | 45.4 | 60.9 | 46.8    | 38.3     | 57.2            | <b>65.2</b>      |
| STS 2012 Average | 54.5 | 59.5 | 70.3 | 56.5    | 40.1     | 58.5            | <b>66.1</b>      |
| headline         | 64.0 | 68.3 | 78.4 | 68.1    | 54.4     | 72.3            | <b>75.0</b>      |
| OnWN             | 52.8 | 64.8 | 84.3 | 54.4    | 33.5     | <b>70.5</b>     | 67.8             |
| FNWN             | 32.7 | 38.1 | 58.2 | 26.4    | 10.6     | <b>47.5</b>     | 42.3             |
| SMT              | 31.8 | 34.6 | 40.4 | 42.0    | 24.2     | 40.3            | <b>43.6</b>      |
| STS 2013 Average | 45.3 | 51.4 | 65.3 | 47.7    | 30.7     | <b>57.7</b>     | 57.2             |
| deft forum       | 36.6 | 46.8 | 53.1 | 45.6    | 19.4     | 50.2            | <b>62.7</b>      |
| deft news        | 66.2 | 74.0 | 78.5 | 73.5    | 54.6     | 73.2            | <b>77.0</b>      |
| headline         | 67.1 | 75.4 | 78.4 | 67.4    | 53.7     | 69.1            | <b>74.3</b>      |
| images           | 75.6 | 79.0 | 83.4 | 68.7    | 53.6     | <b>80.0</b>     | 77.6             |
| OnWN             | 78.0 | 81.1 | 87.5 | 66.8    | 46.1     | <b>79.9</b>     | 77.0             |
| tweet news       | 64.7 | 72.2 | 79.2 | 66.2    | 53.6     | 76.8            | <b>79.1</b>      |
| STS 2014 Average | 64.7 | 71.4 | 76.7 | 64.7    | 46.8     | 71.5            | <b>74.7</b>      |
| answers-forums   | 61.3 | 68.2 | 73.9 | 47.2    | 27.3     | <b>67.4</b>     | 61.5             |
| answers-students | 67.6 | 73.6 | 78.8 | 75.0    | 63.1     | 78.3            | <b>78.5</b>      |
| belief           | 67.7 | 72.2 | 77.2 | 65.7    | 22.6     | 76.0            | <b>77.2</b>      |
| headline         | 74.2 | 80.8 | 84.2 | 72.2    | 61.7     | 74.5            | <b>78.7</b>      |
| images           | 80.4 | 84.3 | 87.1 | 70.0    | 52.8     | 82.2            | <b>84.4</b>      |
| STS 2015 Average | 70.2 | 75.8 | 80.2 | 66.0    | 45.5     | 75.7            | <b>76.1</b>      |
| 2014 SICK        | 71.4 | 79.9 | 82.8 | 62.9    | 50.3     | <b>72.0</b>     | 70.0             |
| 2015 Twitter     | 49.9 | 52.5 | 61.9 | 48.6    | 39.9     | 52.7            | <b>53.6</b>      |
| <b>Average</b>   | 59.7 | 65.6 | 73.6 | 59.2    | 41.9     | 66.2            | <b>68.7</b>      |

**Table 1:** Results on SemEval textual similarity datasets (Pearson’s  $r \times 100$ ). The highest score in each row is in boldface (omitting the official task score columns).

all unique characters in the training data. For charLSTM, we tuned over whether to include an output gate. For charCNN, we tuned the filter activation function (rectified linear or tanh) and tuned the activation for the fully-connected layer (tanh or linear). For both the charLSTM and charCNN models, we tuned  $\lambda$  over  $\{10^{-4}, 10^{-5}, 10^{-6}\}$ .

### 3 Full Sentence Embedding Results

Table 1 shows the full results of our sentence similarity experiments.

## References

- [Ganitkevitch et al.2013] Juri Ganitkevitch, Benjamin Van Durme, and Chris Callison-Burch. 2013. PPDB: The Paraphrase Database. In *Proceedings of HLT-NAACL*.
- [Ling et al.2015] Wang Ling, Chris Dyer, Alan W Black, Isabel Trancoso, Ramon Fernandez, Silvio Amir, Luis Marujo, and Tiago Luis. 2015. Finding function in form: Compositional character models for open vocabulary word representation. In *Proceedings of the 2015 Conference on Empirical Methods in Natural Language Processing*.

[Wieting et al.2015] John Wieting, Mohit Bansal, Kevin Gimpel, Karen Livescu, and Dan Roth. 2015. From paraphrase database to compositional paraphrase model and back. *Transactions of the ACL (TACL)*.

[Wieting et al.2016] John Wieting, Mohit Bansal, Kevin Gimpel, and Karen Livescu. 2016. Towards universal paraphrastic sentence embeddings. In *Proceedings of International Conference on Learning Representations*.
